# Supplementary material for: Pyrethroid-Resistance and Presence of Two Knockdown Resistance (kdr) Mutations, F1534C and a Novel Mutation T1520I, in Indian Aedes aegypti
Source: PubMed Central journal article supplement (PMC4287524; doi:10.1371/journal.pntd.0003332), 2015-01-08

Figure S1: Geographical locations of mosquito collection

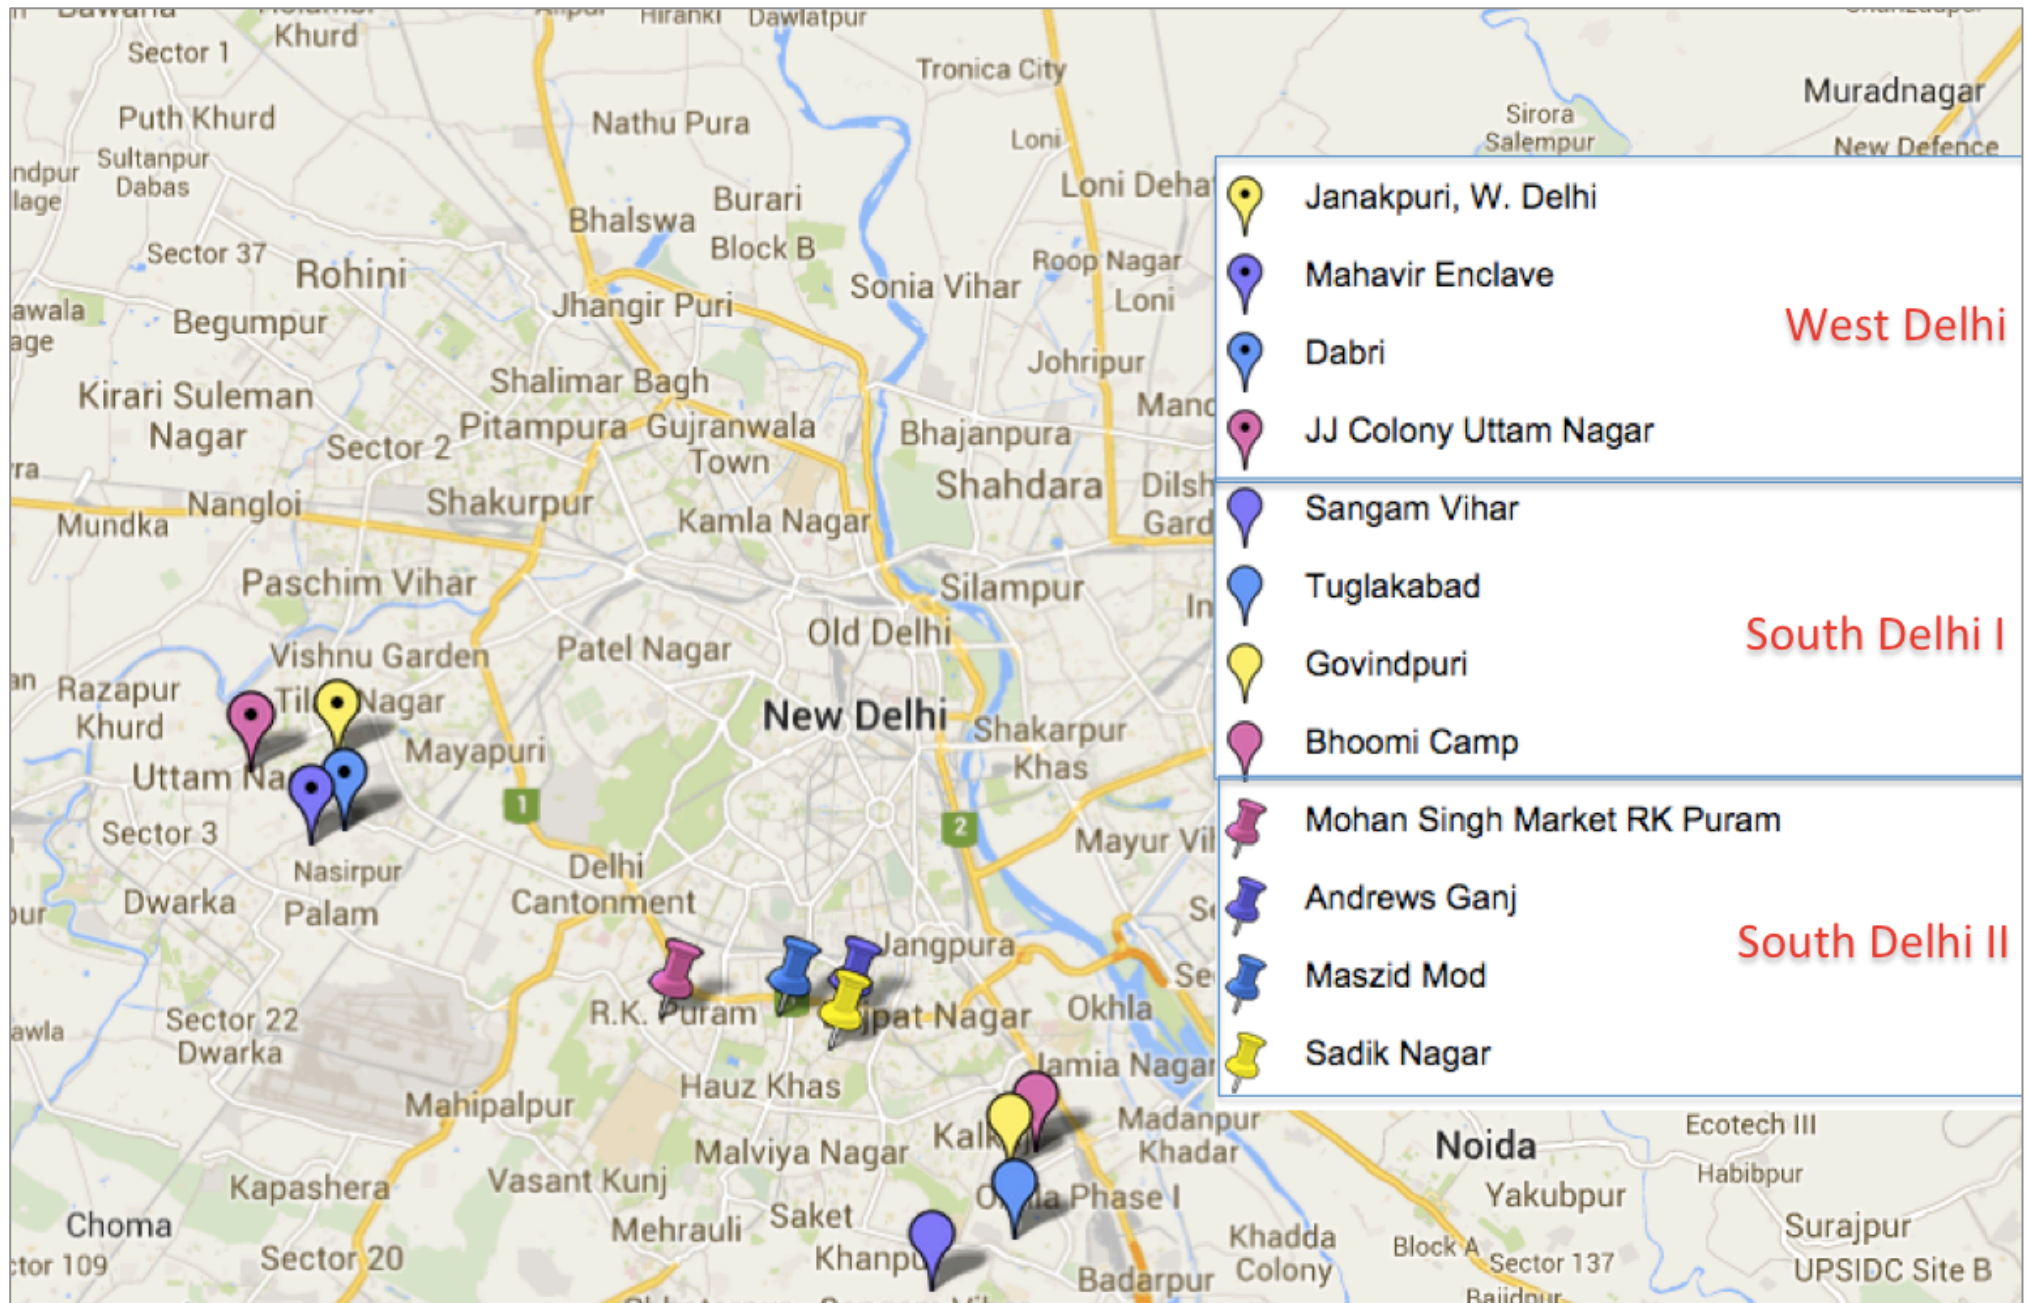

Supplement: pntd.0003332.s001.pdf [file pntd.0003332.s001.pdf]
